# Supplementary material for: A Blood-Brain-Barrier-Penetrating Anti-human Transferrin Receptor Antibody Fusion Protein for Neuronopathic Mucopolysaccharidosis II
Source: PubMed Central journal article supplement — Mol Ther. 2018 Mar 6;26(5):1366–74. doi: 10.1016/j.ymthe.2018.02.032 (PMC5993955; doi:10.1016/j.ymthe.2018.02.032), 2018-03-06
Supplement: mmc1.pdf [file mmc1.pdf]

**Supplemental Information**

**A Blood-Brain-Barrier-Penetrating Anti-human  
Transferrin Receptor Antibody Fusion Protein  
for Neuronopathic Mucopolysaccharidosis II**

**Hiroyuki Sonoda, Hideto Morimoto, Eiji Yoden, Yuri Koshimura, Masafumi Kinoshita, Galina Golovina, Haruna Takagi, Ryuji Yamamoto, Kohtaro Minami, Akira Mizoguchi, Katsuhiko Tachibana, Tohru Hirato, and Kenichi Takahashi**

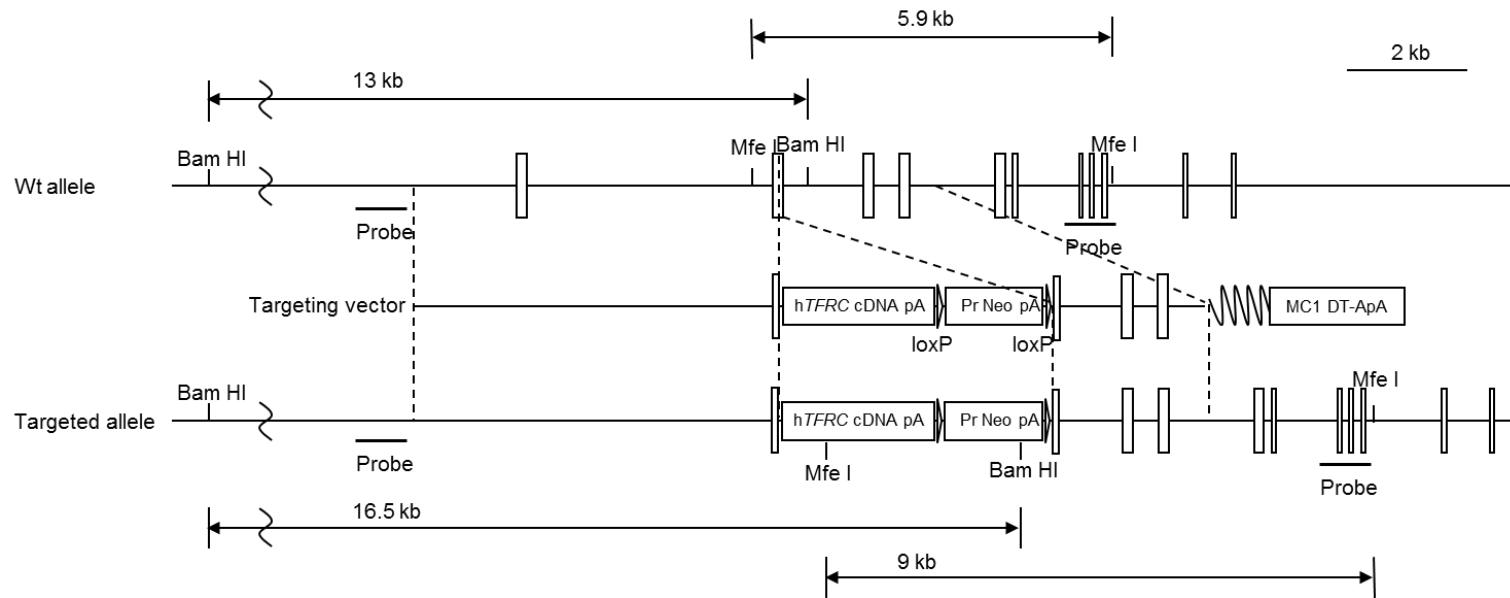

**Figure S1. Schematic representation of mouse *Tfrc* gene, targeting vector, and targeted allele**

A human *TFRC* cDNA cassette was inserted into exon 2 of the mouse *Tfrc* gene. Positive and negative clones can be discriminated by the DNA fragment size in Southern blot analysis after digestion with Bam HI or Mfe I.

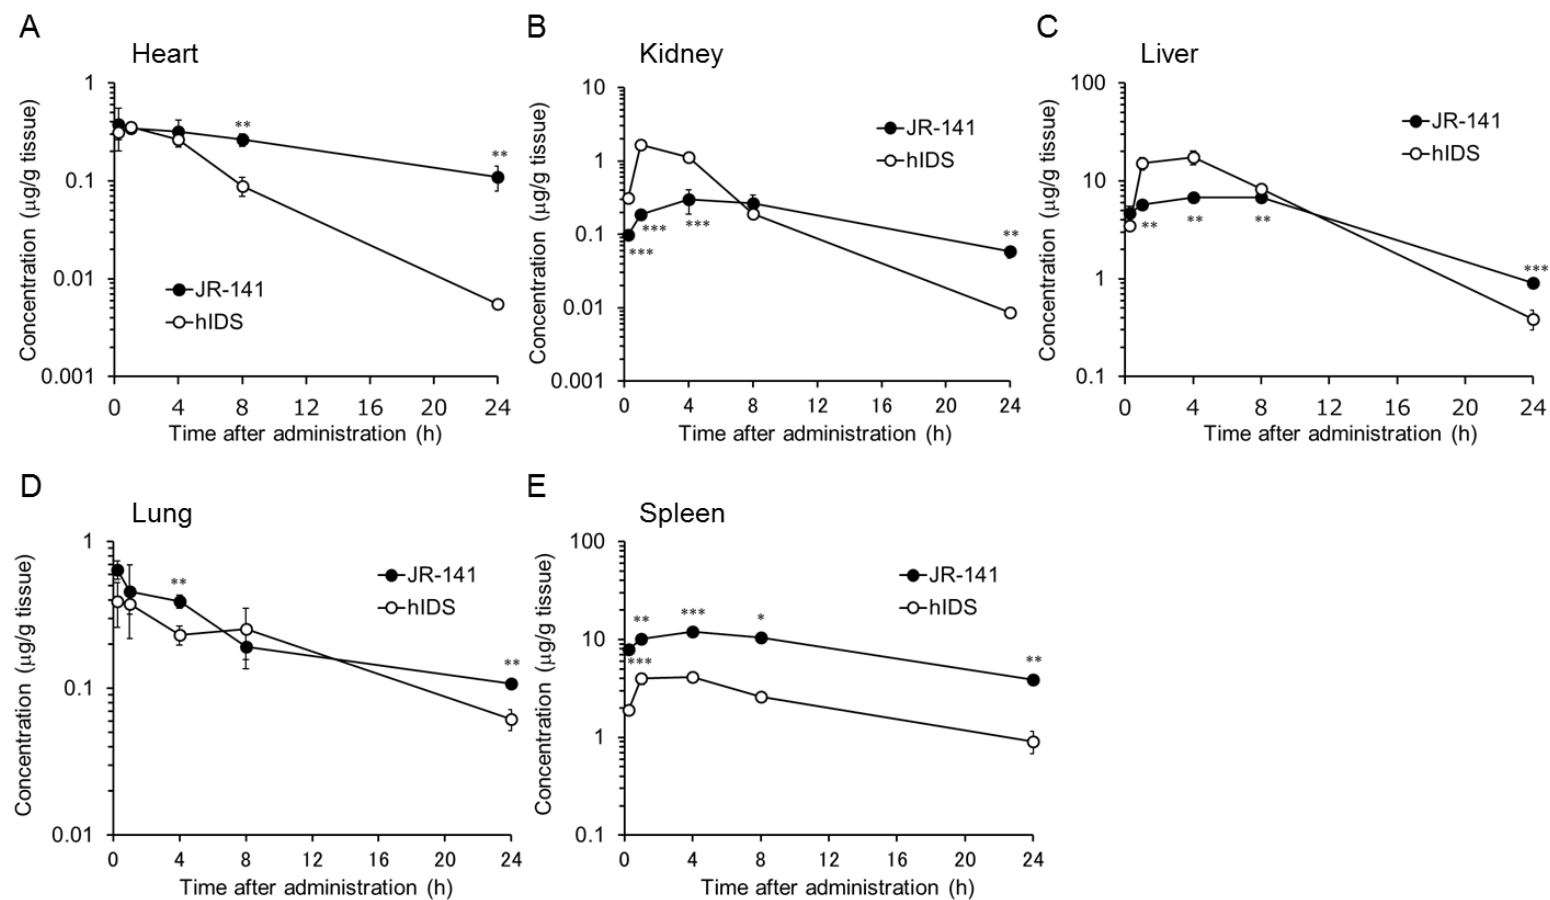

**Figure S2. Pharmacokinetics of JR-141 and hIDS in peripheral tissues of *TFRC*-KI mice**

Concentration of JR-141 was measured in the heart (A), kidney (B), liver (C), lung (D), and spleen (E) by electrochemiluminescent immunoassay (n = 3; \* $P < 0.05$ , \*\* $P < 0.01$ , \*\*\* $P < 0.001$ , *t*-test). Data are plotted as mean  $\pm$  SD bars.

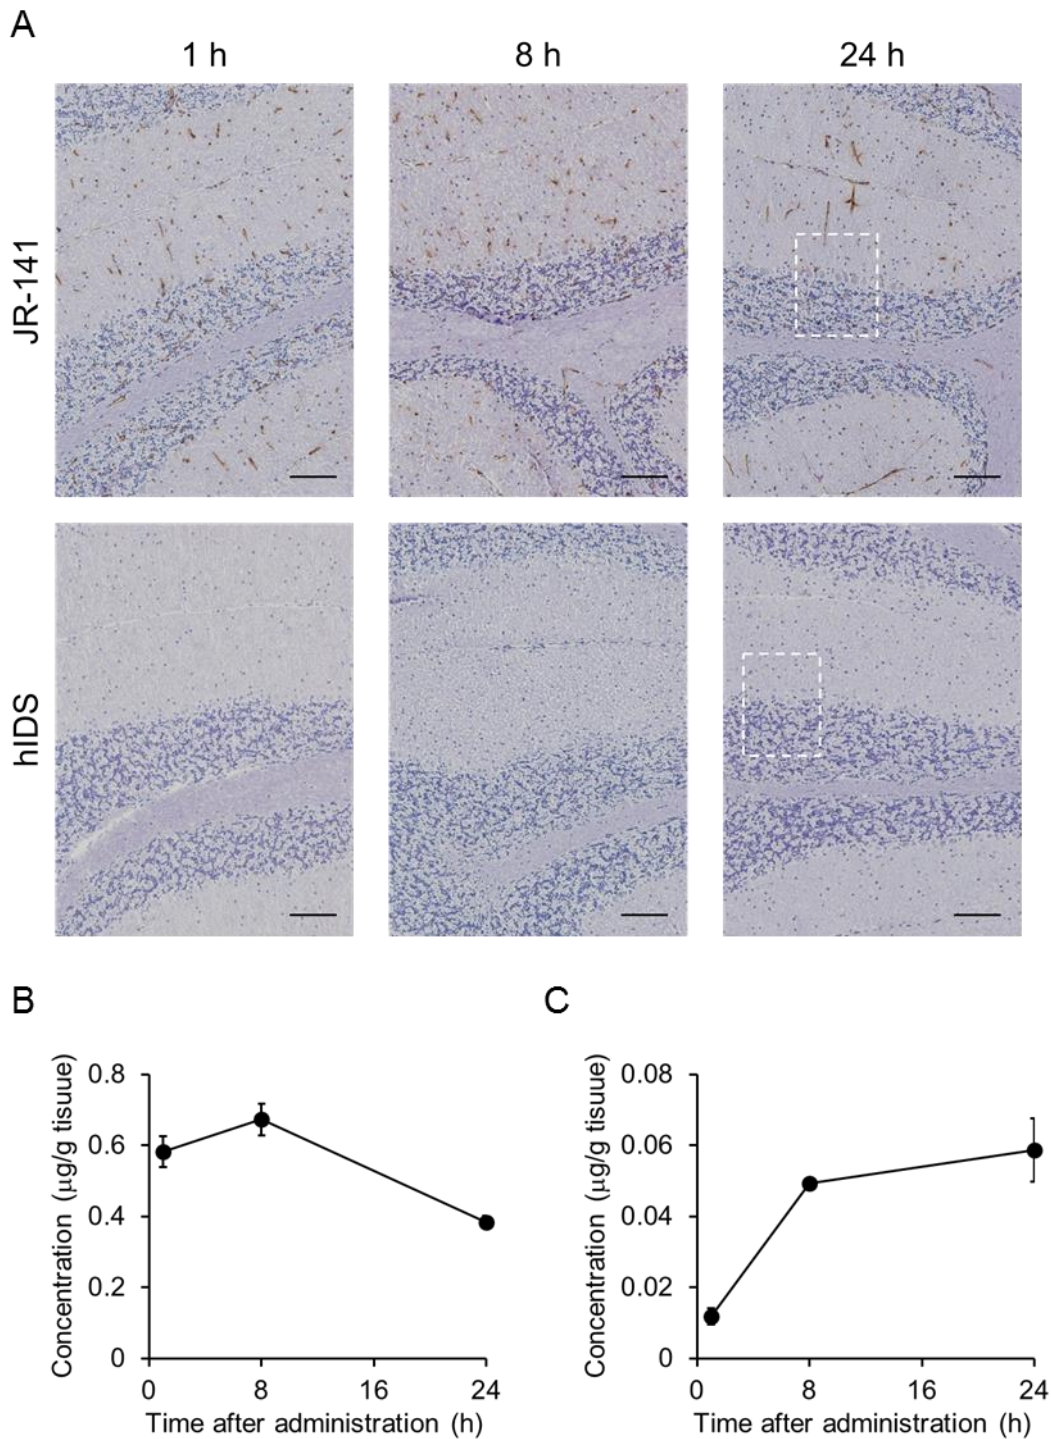

**Figure S3. Immunohistochemistry in the brain of *TFRC-KI* mice**

(A) Low magnification microphotographs of the cerebellum at 1, 8, 24 h after the administration of 1 mg/kg of JR-141 or naked IDS. White dashed rectangles indicate the highly magnified areas shown in Figure 3C. Scale bars, 100  $\mu\text{m}$ . (B and C) Concentrations of JR-141 in brain capillaries (B) and parenchyma (C). Data are plotted as mean  $\pm$  SD bars ( $n = 3$ ).

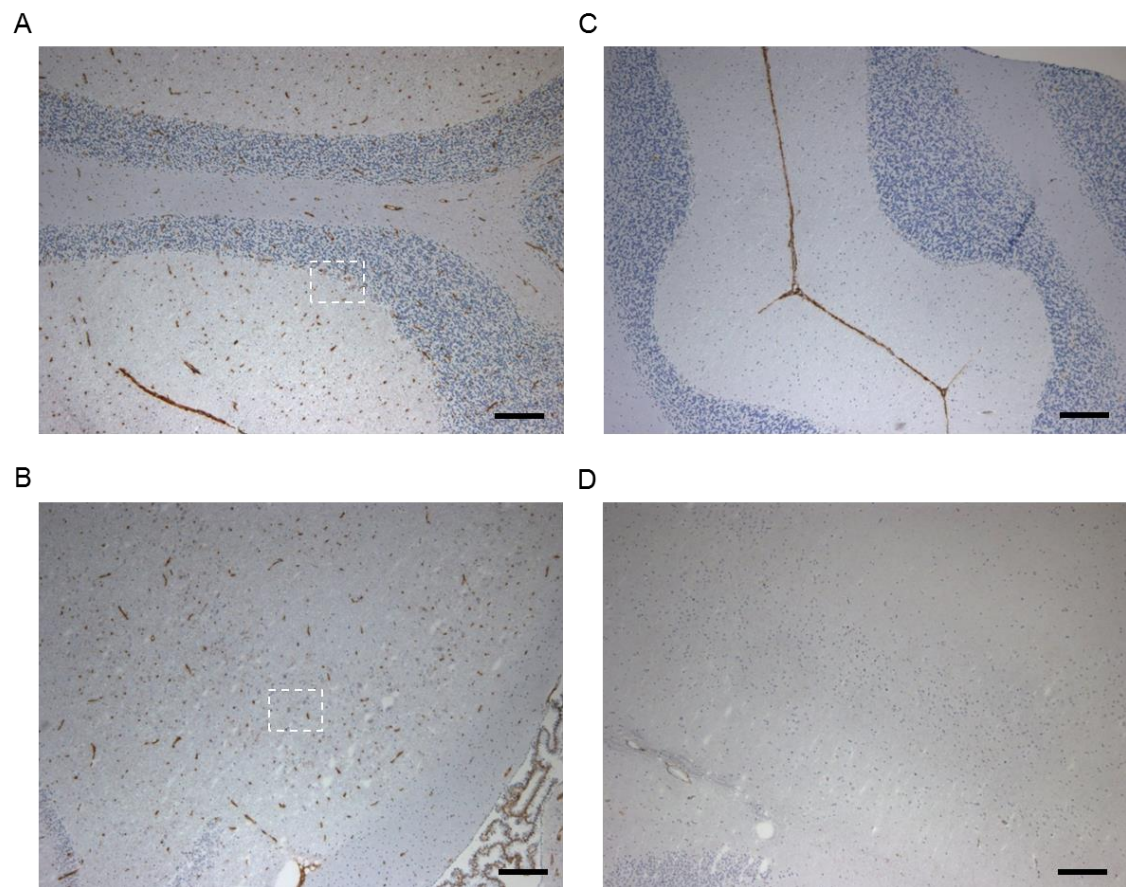

**Figure S4. Immunohistochemistry in the brain of cynomolgus monkey**

Representative brain sections from the JR-141 (5 mg/kg) group (A and B) and control (no administration) group (C and D). Low magnification microphotographs of the cerebellum (A and C) and the hippocampus (B and D) are shown. Non-specific staining is observed in the pia mater (C). White dashed rectangles indicate the highly magnified areas shown in Figures 4D and 4E. Scale bars, 200  $\mu$ m.

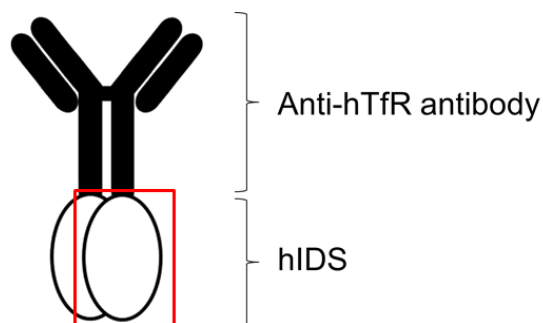

|             |             |             |            |             |
|-------------|-------------|-------------|------------|-------------|
| SETQANSTTD  | ALNVLLIIVD  | DLRPSLGCYG  | DKLVRSPNID | QLASHSLLFQ  |
| NAFAQQAVCA  | PSRVSF LTGR | RPDTTRL YDF | NSYWRVHAGN | FSTIPQYFKE  |
| NGYVTMSVGK  | VFHPGISSNH  | TDDSPYSWSF  | PPYHPSSEKY | ENTKTCRGPD  |
| GELHANLLCP  | VDVLDVPEGT  | LPDKQSTEQA  | IQLLEKMKTS | ASPFFLAVGY  |
| HKPHIPFRYP  | KEFQKLYPLE  | NITLAPDPEV  | PDGLPPVAYN | PWMDIRQRED  |
| VQALNISVPY  | GPIPVD FQRK | IRQSYFASVS  | YLDTQVGRL  | SALDDLQLAN  |
| STIIAFTSDH  | GWALGEHGEW  | AKYSNFDVAT  | HVPLIFYVPG | RTASLPEAGE  |
| KLFPYLD PFD | SASQLMEPGR  | QSMDLVELVS  | LFPTLAGLAG | LQVPPRC PVP |
| SFHVELCREG  | KNLLKHFRFR  | DLEEDPYLPG  | NPRELIAYSQ | YPRPSDIPQW  |
| NSDKPSLKDI  | KIMGYSIRTI  | DYRYTVWVGF  | NPDEFLANFS | DIHAGELYFV  |
| DSDPLQDHNM  | YNDSQGGDLF  | QLLMP       |            |             |

**Figure S5. The amino acid sequence of the hIDS moiety of JR-141 predicted from the cDNA sequence**

N: N-glycosylation site

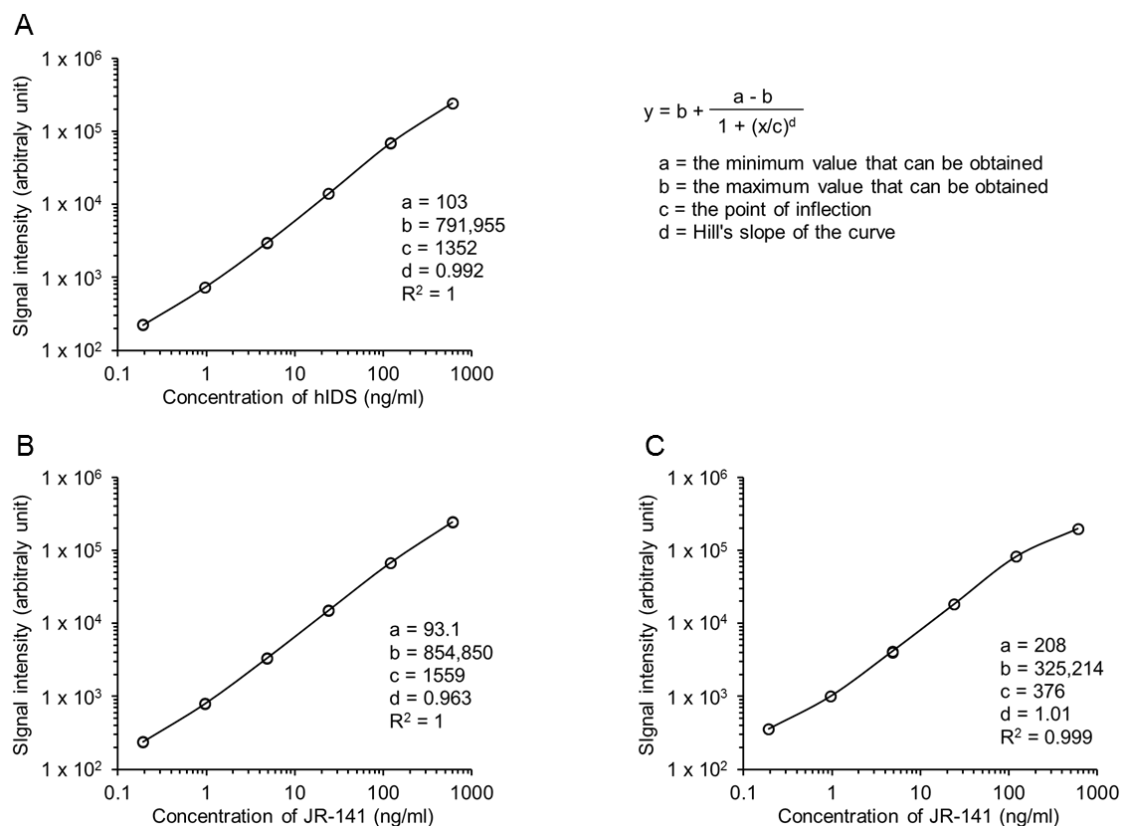

**Figure S6. Validity of electrochemiluminescent immunoassay of hIDS and JR-141**

(A) A representative standard curve for hIDS measurement. Defined concentrations of hIDS were added to the mixture of the sulfo-labeled anti-hIDS antibody and the biotinylated anti-hIDS antibody, and the reactions were then added to pre-blocked Streptavidin Gold plate (Meso Scale Diagnostics, Gaithersburg, MD). The intensity of electrochemiluminescence was quantified by Sector Imager 6000 (Meso Scale Diagnostics). (B and C) Representative standard curves for JR-141 measurement. Defined concentrations of JR-141 were mixed with biotinylated light chain of anti-human IgG antibody (B) or biotinylated anti-hIDS antibody (C) and SULFO-TAG-labeled anti-hIDS antibody. The subsequent procedure was similar to that described in (A). Four-parameter logistic regression was applied.

**Table S1. Pharmacokinetic parameters of JR-141 and naked hIDS after intravenous administration to *TFRC-KI* mice**

|        | Drug   | C <sub>max</sub><br>(µg/ml or g) | AUC <sub>0-t</sub><br>(µg·h/ml or g) | AUC <sub>0-inf</sub><br>(µg·h/ml or g) | t <sub>1/2</sub><br>(h) | MRT<br>(h) | CL<br>(ml/h/kg) | V <sub>ss</sub><br>(ml/kg) |
|--------|--------|----------------------------------|--------------------------------------|----------------------------------------|-------------------------|------------|-----------------|----------------------------|
| Plasma | JR-141 | 15.3                             | 25.4                                 | 25.6                                   | 4.37                    | 1.78       | 39.1            | 69.5                       |
|        | hIDS   | 21.2                             | 17.9                                 | 17.9                                   | 4.89                    | 0.718      | 55.8            | 40.1                       |
| Brain  | JR-141 | 0.440                            | 8.14                                 | 16.6                                   | 23.9                    | 34.9       | 60.4            | 2,110                      |
|        | hIDS   | -                                | -                                    | -                                      | -                       | -          | -               | -                          |
| Heart  | JR-141 | 0.370                            | 5.51                                 | 7.55                                   | 12.9                    | 17.8       | 132             | 2,350                      |
|        | hIDS   | 0.356                            | 2.68                                 | 2.71                                   | 3.69                    | 4.95       | 369             | 1,830                      |
| Kidney | JR-141 | 0.297                            | 4.54                                 | 5.24                                   | 8.13                    | 11.8       | 191             | 2,250                      |
|        | hIDS   | 1.66                             | 9.17                                 | 9.20                                   | 3.02                    | 3.99       | 109             | 433                        |
| Liver  | JR-141 | 6.82                             | 112                                  | 120                                    | 5.51                    | 8.85       | 8.36            | 74.0                       |
|        | hIDS   | 17.4                             | 177                                  | 179                                    | 3.64                    | 5.97       | 5.58            | 33.3                       |
| Lung   | JR-141 | 0.588                            | 5.40                                 | 7.21                                   | 12.3                    | 16.4       | 139             | 2,270                      |
|        | hIDS   | 0.399                            | 4.79                                 | 5.67                                   | 9.52                    | 12.2       | 176             | 2,150                      |
| Spleen | JR-141 | 11.9                             | 201                                  | 269                                    | 12.0                    | 17.1       | 3.72            | 63.5                       |
|        | hIDS   | 4.14                             | 55.9                                 | 68.2                                   | 9.54                    | 13.3       | 14.7            | 196                        |

C<sub>max</sub>: maximum concentration, AUC<sub>0-t</sub>: area under the concentration-time curve from zero to the time of the last measurable drug concentration, AUC<sub>0-inf</sub>: area under the concentration-time curve from zero to infinity, t<sub>1/2</sub>: half-life, MRT: mean residence time, CL: clearance, V<sub>ss</sub>: steady-state distribution volume.



**Table S2. Pharmacokinetic parameters of JR-141 in plasma after intravenous administration to cynomolgus monkeys**

| $C_{\max}$<br>( $\mu\text{g}/\text{mL}$ ) | $\text{AUC}_{0-t}$<br>( $\mu\text{g}\cdot\text{h}/\text{ml}$ ) | $\text{AUC}_{0-\text{inf}}$<br>( $\mu\text{g}\cdot\text{h}/\text{ml}$ ) | $t_{1/2\beta}$<br>(h) | MRT<br>(h) | CL<br>( $\text{ml}/\text{h}/\text{kg}$ ) | $V_{\text{ss}}$<br>( $\text{ml}/\text{kg}$ ) |
|-------------------------------------------|----------------------------------------------------------------|-------------------------------------------------------------------------|-----------------------|------------|------------------------------------------|----------------------------------------------|
| 75.4                                      | 446                                                            | 424                                                                     | 4.69                  | 6.25       | 12.2                                     | 74.1                                         |

$C_{\max}$ : maximum concentration,  $\text{AUC}_{0-t}$ : area under the concentration-time curve from zero to the time of the last measurable drug concentration,  $\text{AUC}_{0-\text{inf}}$ : area under the concentration-time curve from zero to infinity,  $t_{1/2}$ : half-life of  $\beta$  phase, MRT: mean residence time, CL: clearance,  $V_{\text{SS}}$ : steady-state distribution volume.

**Table S3. Absolute values of concentration of GAG levels in the brain and peripheral tissues**

|                          |  | GAG ( $\mu\text{g}/\text{mg}$ tissue) |      |                |           |       |                |       |           |                |       |      |                |       |       |                |           |      |                |      |           |                |      |      |           |
|--------------------------|--|---------------------------------------|------|----------------|-----------|-------|----------------|-------|-----------|----------------|-------|------|----------------|-------|-------|----------------|-----------|------|----------------|------|-----------|----------------|------|------|-----------|
|                          |  | Brain                                 |      |                |           | Heart |                |       |           | Kidney         |       |      |                | Liver |       |                |           | Lung |                |      |           | Spleen         |      |      |           |
|                          |  | mean                                  | SD   | <i>P</i> value | mean      | SD    | <i>P</i> value | mean  | SD        | <i>P</i> value | mean  | SD   | <i>P</i> value | mean  | SD    | <i>P</i> value | mean      | SD   | <i>P</i> value | mean | SD        | <i>P</i> value |      |      |           |
| Wilde-type               |  | 2.15                                  |      |                | 0.97      |       |                | 2.00  |           |                | 0.98  |      |                | 1.09  |       |                | 0.64      |      |                |      |           |                |      |      |           |
|                          |  | 2.37                                  | 2.29 | 0.09           | -         | 0.95  | 0.89           | 0.08  | -         | 1.96           | 1.98  | 0.02 | -              | 1.10  | 1.07  | 0.07           | -         | 1.06 | 1.09           | 0.04 | -         | 0.55           | 0.59 | 0.07 | -         |
|                          |  | 2.33                                  |      |                |           | 0.78  |                |       |           | 1.99           |       |      |                | 1.05  |       |                |           | 1.08 |                |      |           | 0.51           |      |      |           |
|                          |  | 2.29                                  |      |                |           | 0.88  |                |       |           | 1.96           |       |      |                | 1.15  |       |                |           | 1.15 |                |      |           | 0.65           |      |      |           |
| <i>Ids</i> -KO (Control) |  | 3.14                                  |      |                | 4.89      |       |                | 11.65 |           |                | 14.95 |      |                | 7.40  |       |                | 4.65      |      |                |      |           |                |      |      |           |
|                          |  | 3.05                                  | 3.11 | 0.10           | -         | 6.22  | 5.63           | 0.56  | -         | 11.98          | 11.97 | 0.33 | -              | 19.16 | 15.69 | 2.57           | -         | 7.28 | 7.09           | 0.32 | -         | 4.54           | 4.73 | 0.79 | -         |
|                          |  | 3.01                                  |      |                |           | 5.57  |                |       |           | 12.43          |       |      |                | 15.67 |       |                |           | 7.02 |                |      |           | 3.91           |      |      |           |
|                          |  | 3.24                                  |      |                |           | 5.83  |                |       |           | 11.82          |       |      |                | 13.00 |       |                |           | 6.67 |                |      |           | 5.82           |      |      |           |
| 1 mg/kg                  |  | 2.71                                  |      |                | 2.00      |       |                | 8.67  |           |                | 3.60  |      |                | 5.83  |       |                | 1.76      |      |                |      |           |                |      |      |           |
|                          |  | 2.71                                  | 2.72 | 0.07           | 0.000053  | 2.05  | 2.03           | 0.18  | 4.54.E-08 | 8.09           | 7.65  | 1.13 | 0.000004       | 3.47  | 3.31  | 0.48           | 0.000028  | 6.16 | 5.99           | 0.31 | 0.005     | 1.52           | 1.57 | 0.13 | 0.000001  |
|                          |  | 2.81                                  |      |                |           | 2.26  |                |       |           | 7.79           |       |      |                | 3.58  |       |                |           | 6.33 |                |      |           | 1.51           |      |      |           |
|                          |  | 2.63                                  |      |                |           | 1.82  |                |       |           | 6.06           |       |      |                | 2.60  |       |                |           | 5.66 |                |      |           | 1.50           |      |      |           |
| JR-141 3 mg/kg           |  | 2.50                                  |      |                | 1.66      |       |                | 5.07  |           |                | 3.69  |      |                | 4.94  |       |                | 1.35      |      |                |      |           |                |      |      |           |
|                          |  | 2.39                                  | 2.43 | 0.06           | 5.77.E-07 | 1.62  | 1.64           | 0.02  | 4.26.E-08 | 4.17           | 4.46  | 0.52 | 6.78.E-08      | 2.68  | 3.19  | 0.50           | 4.33.E-07 | 3.98 | 4.28           | 0.57 | 0.000003  | 1.29           | 1.33 | 0.03 | 0.000001  |
|                          |  | 2.40                                  |      |                |           | 1.65  |                |       |           | 4.15           |       |      |                | 3.19  |       |                |           | 3.93 |                |      |           | 1.34           |      |      |           |
|                          |  | 2.40                                  |      |                |           | 1.28  |                |       |           | 3.03           |       |      |                | 2.20  |       |                |           | 2.17 |                |      |           | 1.00           |      |      |           |
| 10 mg/kg                 |  | 2.54                                  |      |                | 1.23      |       |                | 3.39  |           |                | 2.27  |      |                | 2.35  |       |                | 1.27      |      |                |      |           |                |      |      |           |
|                          |  | 2.54                                  | 2.49 | 0.06           | 6.54.E-07 | 1.23  | 1.25           | 0.05  | 3.49.E-08 | 3.39           | 3.23  | 0.19 | 3.64.E-08      | 2.27  | 2.43  | 0.31           | 1.32.E-07 | 2.35 | 2.46           | 0.36 | 4.23.E-08 | 1.27           | 1.19 | 0.14 | 4.46.E-07 |
|                          |  | 2.52                                  |      |                |           | 1.30  |                |       |           | 3.40           |       |      |                | 2.88  |       |                |           | 3.00 |                |      |           | 1.31           |      |      |           |
|                          |  | 2.51                                  |      |                |           | 1.19  |                |       |           | 3.12           |       |      |                | 2.38  |       |                |           | 2.33 |                |      |           | 1.18           |      |      |           |
| hIDS 0.5 mg/kg           |  | 3.11                                  |      |                | 1.50      |       |                | 7.36  |           |                | 4.27  |      |                | 5.12  |       |                | 2.14      |      |                |      |           |                |      |      |           |
|                          |  | 3.07                                  | 2.98 | 0.14           | 0.179     | 1.54  | 1.51           | 0.11  | 0.000007  | 8.40           | 8.19  | 0.67 | 0.000055       | 3.50  | 3.79  | 0.34           | 0.000094  | 5.29 | 4.93           | 0.80 | 0.002     | 1.97           | 1.99 | 0.12 | 0.00049   |
|                          |  | 2.94                                  |      |                |           | 1.36  |                |       |           | 8.96           |       |      |                | 3.61  |       |                |           | 3.75 |                |      |           | 1.99           |      |      |           |
|                          |  | 2.80                                  |      |                |           | 1.64  |                |       |           | 8.03           |       |      |                | 3.79  |       |                |           | 5.55 |                |      |           | 1.86           |      |      |           |

Differences between *Ids*-KO control and JR-141 groups, and *Ids*-KO control and hIDS groups were analyzed with Dunnett's test and Student *t*-test, respectively.

## SUPPLEMENTAL MATERIALS AND METHODS

### Generation of *TFRC-KI* mice

*TFRC-KI* mice in a C57BL/6 background were generated by homologous recombination of the *TFRC* gene with the mouse *Tfrc* gene. A cDNA coding for a chimeric protein of the extracellular domain of human TFRC and the transmembrane and intracellular domain of mouse *Tfrc* was inserted into exon 2 of the mouse *Tfrc* gene (Figure S1). The nucleotide sequence of the cDNA with loxP-neo-loxP is shown below:

```
gtttatcctcccttgttagcagctgagaATGATGGATCAAGCCAGATCAGCATTCTCTAACTTGTGGTGGTGGGAAACCATTGTCATACACCCGGTTTAGCCTTGCTCGGCAAGTAGATGGAGATAACAGTCATGTGGAGATGAAACTGGCTGCAGATGAAGAAGAAAAATGCCGACAATAACATGAAGGCTAGTGTGAGAAAACCCAAGAGGTTTAATGGAAGACTCTGCTTTGCAGCTATTGCAGTAGTCATTTTCTTCTTGATTGGATTTCATGAGTGGCTACCTGGGCTATTGTAAGGGGTAGAACCAAAAACTGAGTGTGAGAGACTGGCAGGAACCGAGTCTCCAGTGAGGGAGGAGCCAGGAGAGGACTTCCCTGCAGCACGTCGCTTATATTGGGATGACCTGAAGAGAAAGTTGTCCGAGAACTGGACAGCACAGACTTCACCCGGCACCATCAAGCTGCTGAAATGAAAATTCATATGTCCCTGTGAGGCTGGATCTCAAAAAAGATGAAAAATCTTGCCTTGTATGTTGAAAAATCAATTTCTGTAATTTAACTCAGCAAAGTCTGGCGTGATCAACATTTTGTAAAGATTTCAGGTCAAAGACAGCGCTCAAACCTCGGTGATCATAGTTGATAAAGAACGGTAGACTTGTTTACCTGGTGGAGAATCCTGGGGTTATGTGGCGTATAGTAAGCTGCAACAGTTACTGGTAAACTGGTCCATGCTAAATTTTGGTACTAAAAAAGATTTTGAGGATTTATACACTCCTGTGAATGGATCTATAGTGATTGTCAGAGCAGGAAAATCACCTTTGCAGAAAAGGTTGCAAATGCTGAAAGCTTAAATGCAATTGGTGTGTTGATATACATGGACCAGACTAAATTTCCCATTTGTTAACGCAGAACTTTCATTCTTTGGACATGCTCATCTGGGGACAGGTGACCCCTTACACACCTGGATTCCCTTCCTTCAATCACTCAGTTTCCACCATCTCGGTTCATCAGGATTGCCTAATATACCTGTCCAGACAATCCAGAGACTGCTGCAGAAAAGCTGTTTGGAAATATGGAAGGAGACTGTCCCTCTGACTGGAAAACAGACTCTACATGTAGGATGGTAACTCAGAAAAGCAAGAATGTGAAGCTCACTGTGAGCAATGTGCTGAAAGAGATAAAAAATCTTAAATCTTTGGAGTTATTAAGGCTTTGTAGAACCAGATCACTATGTTGTAGTTGGGGCCCAGAGAGATGCATGGGGCCCTGGAGCTGCAAAATCCGGTGTAGGCACAGCTCTCCTATTGAAACTTGCCAGATGTTCTCAGATATGGTCTTAAAAAGATGGGTTCAGCCAGCAGAAGCATTATCTTTGCCAGTTGGAGTGTGGAGACTTTGGATCGGTGGTGCACCTGAATGGCTAGAGGGATACCTTTTCGTCCTGCATTTAAAGGCTTTCATTATATTAATCTGGATAAAAGCGGTTCTTGGTACCAGCAACTTCAAGGTTTCTGCCAGCCACTGTTGTATACGCTTATTGAGAAAAAATGCAAAATGTGAAGCATCCGGTTACTGGGCAATTTCTATATCAGGACAGCAACTGGCCAGCAAAGTTGAGAACTCACTTTAGACAATGCTGCTTTCCCTTTCCCTGTCATATCTGGAATCCCAAGCAGTTTCTTTCTGTTTTTGCAGGACACAGATTATCCTTATTTGGGTACCACCATGGACACCTATAAGGAAGTGAATGAGAGGATTCCTGAGTTGAACAAGTGGCAGCAGCAGCTGCAGAGGTCGCTGGTCACTGATTAACCAATACCCATGATGTTGAATGAACCTGGACTATGAGAGGTACAACAGCCAATGCTTTTCAATTTGTGGAGATCTGAACCAATACAGAGCAGACATAAAGGAAATGGGCTGAGTTTACAGTGGCTGTATCTGCTCGTGAGACTTCTTCCGTGCTACTTCCAGACTAACACAGATTTCCGGAAATGCTGAGAAAACAGACAGATTTGTGATGAAGAACTCAATGATCGTGTGATGAGAGTGGAGTATCACTTCCCTCTCTCCCTACGTATCTCCAAAAGAGTCTCCTTTCCGACATGCTTCTGGGGCTCCGGCTCTCACACGCTGCCAGCTTTACTGGAGAACTTGAAACTGCGTAAACAAAAATAACGGTGCCTTTAATGAAACGCTGTTTCAAGAAACAGTTGGCTTAGCTACTTGGACTATTACAGGAGCTGCAAAATGCCCTCTCTGGTGACGTTTGGGACATTGACAATGAGTTTAAACAGTGGCTCGCTCAGCCTCGACTGTGCCTTCTAGTTGCCAGCCATCTGTTGTTTGGCCCTCCCCCTGCTTCCCTTGACCCTGGAAGGTGCCACTCCCCTGTCCTTTCCCTAATAAAAATGAGGAAATGTCATCGCATTGTCTGAGTAGGTGTCATTCTATTCTGGGGGTGGGGTGGGGCAGGACAGCAAGGGGGAGGATTGGGAAGACAATAGCAGGCATGCTGGGGATGCGGTGGGCTCTATGGCTTCTGAGGCGGAAAGAACCAGCTGGGGCTCGATCCTCTAGTTAagcttcccagcgccgctatcgaaattccgatcatattcaataacccttaatATAACTTCGTATAATGTATGCTATACGAAGTTATtaggtctgaagaggagtttacgtccagccaagctAATTTCTACCGGTAGGGGAGGCGCTTTTCCCAAGGCAGTCTGGAGCATGCGCTTTAGCAGCCCCGTGGGCACCTGGCGCTACACAAGTGGCCTCTGGCCTCGCACACATTTCCACATCCACCGGTAGGCGCAACCGGCTCCGTTCTTTGGTGGCCCCCTTCGCGCACCTTCTACTCCTCCCTTAGTCAGGAAGTTCCCCCGCCCCGAGCTCGCGTGTGTCAGGACGTGACAAAATGGAAGTAGCACGCTCTCACTAGTCTCGTGCAGATGGACAGCACCGCTGAGCATGGAAGCGGGTAGGCCTTTGGGGCAGCGGCCAATAGCAGCTTTGCTCCTTCGCTTTCTGGGCTCAGAGCTGGAAGGGGTGGTCCGGGGCGGGCTCAGGGGCGGGGCGGGGCGCCGAAAGGCTCCTCCGGAGGCCGCTTTCACAGCTTCAAAGCGCACGCTGCGCGCTGTTCTCCTCTTCCCTCATCTCCGGCCTTTCGAacctgcagccaatATGGGATCGGCCATTGAACAAGATGGATTGCACGCAGGTTCTCCGGCCGCTTGGGTGGAGAGGCTATTTCGGCTATGACTGGGCACAACAGACAATCGGCTGCTCTGATGCCGCCGTGTTCCGGCTGTGACGCGAGGGGCGCCCGGTCTTTTTTGTCAAGACCGACCTGTCCGGTGCCTGAATGAATGACAGGACGAGGCGCGGCTATCGTGGCTGGCCACGACGGGCGTTCCTTGGCAGCTGTGCTCGACGTGTCTACTGAAGCGGGAAGGACTGGCTGCTATTTGGGCAAGTGGCGGGCAGGATCTCTGTATCTCACCTTGTCTGCCGAGAAAGTATCCATCATGGCTGATGCAATGCGGCGGCTGCATACGCTTGATCCGGCTACCTGCCATTGACCAAGCGAAACATCGCATCGAGCGAGCACGTACTCGGATGGAAGCCGGTCTTGTGATCAGGATGATCTGGACGAAGAGCATCAGGGGCTCGCGCCAGCCGAACGTTCCGCCAGGCTCAAGGCGCATGCCCGACGGCGAGGATCTCGTCTGACCCATGGCGATGCCTGCTTGCCGAATATCATGGTGGAAA
```

ATGGCCGCTTTTCTGGATTTCATCGACTGTGGCCGGCTGGGTGTGGCGGACCGCTATCAGGACATAGCGTT  
GGCTACCCGTGATATTGCTGAAGAGCTTGGCGGCGAATGGGCTGACCGCTTCCTCGTGCTTTACGGTATC  
GCCGCTCCCGATTTCGACGCGCATCGCCTTCTATCGCCTTCTTGACGAGTTCTTCTGAGgggatccgctgt  
aagtctgcagaaattGATGATCTATTAAACAATAAAGATGTCCACTAAAATGGAAGTTTTTCCTGTCATA  
CTTTGTTAAGAAGGGTGAGAACAGAGTACCTACATTTTGAATGGAAGGATTGGAGCTACGGGGGTGGGGG  
TGGGGTGGGATTAGATAAAATGCCTGCTCTTACTGAAGGCTCTTACTATTGCTTTATGATAAATGTTTCA  
TAGTTGGATATCATAATTTAAacaagcaaaaccaaattaagggccagctcattcctcccactcatgatct  
atagatccctcgatcgagatccggaacccttaatATAACTTCGTATAATGTATGCTATACGAAGTTATta  
ggccctcgaagaggttcactagttctagagcatttaaacgtgctagc

Boxed letters indicate the cDNA for the chimeric receptor and underlines indicate loxP sequences. The expression pattern of TfR in *TFRC-KI* mice was qualitatively similar to that in WT mice.
